# Supplementary material
Source: MDPI journal article supplement (https://www.mdpi.com/2072-4292/13/8/1425)
Supplement: s1 [file s1]

# Supplementary Materials: Predicting Water Stress in Wild Blueberry Fields Using Airborne Visible and Near Infrared Imaging Spectroscopy

Catherine Chan, Peter R. Nelson, Daniel J. Hayes, Yong-Jiang Zhang and Bruce

## Irrigated/non-irrigated models

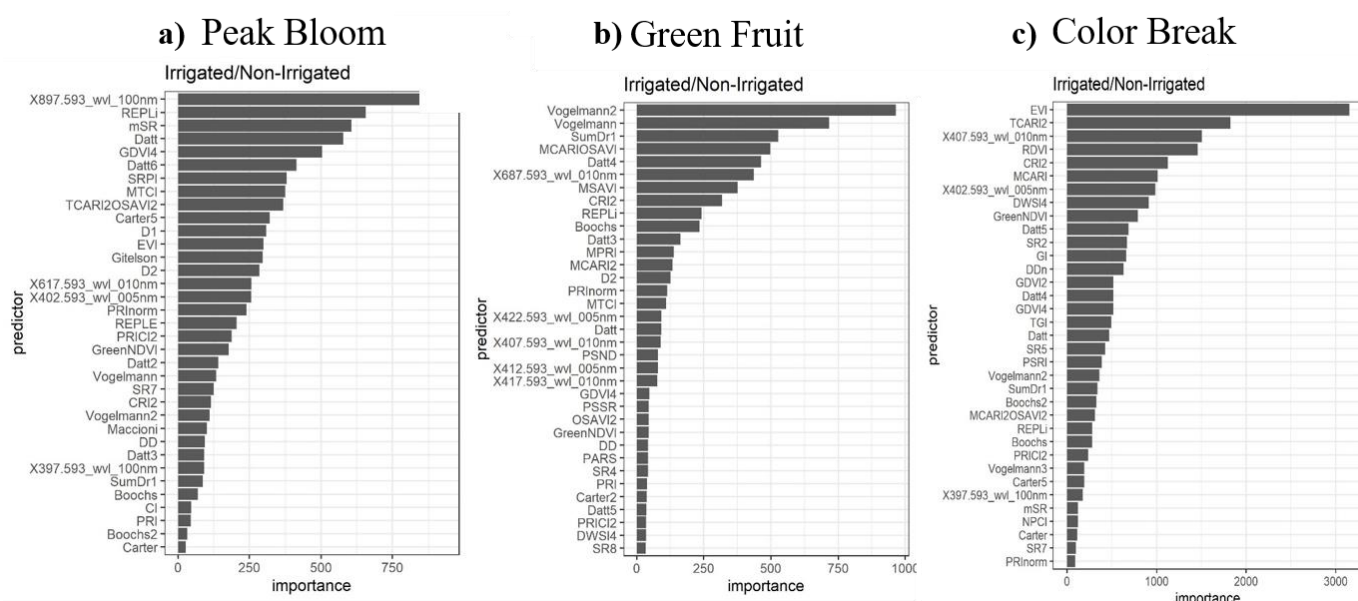

**Figure S1.** Plot of the 35 most important predictor variables in the local models and corresponding importance levels.

## Local water potential models

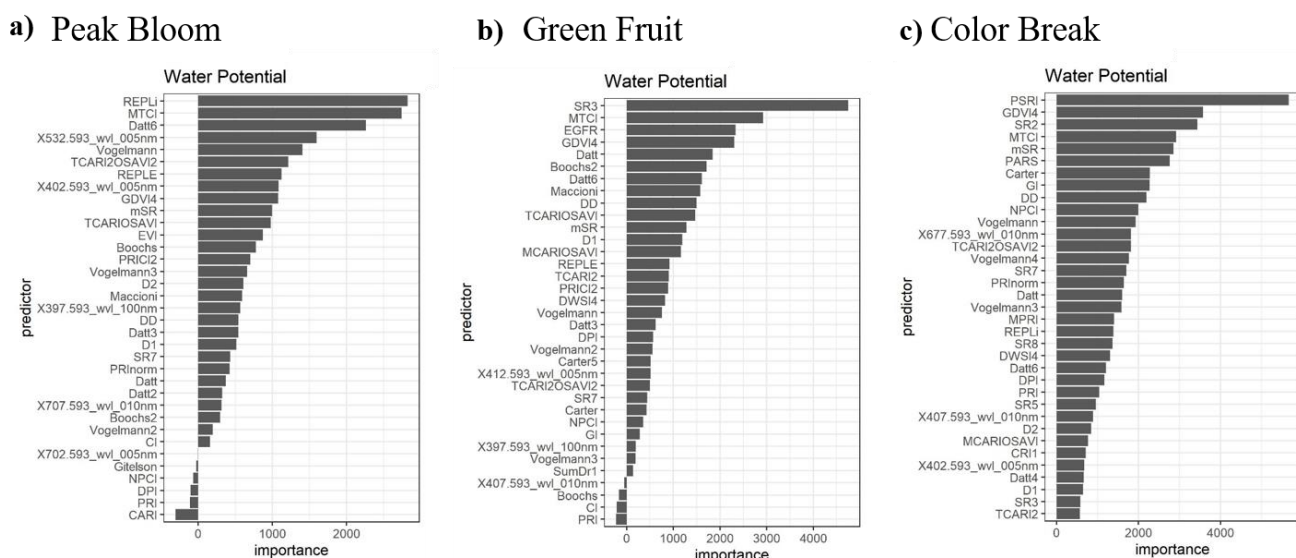

**Figure S2.** Plot of the 35 most important predictor variables in the local water potential models and corresponding importance levels.
